# Supplementary material for: Characterization of maize roothairless6 which encodes a D-type cellulose synthase and controls the switch from bulge formation to tip growth
Source: PubMed Central journal article supplement (PMC5052636; doi:10.1038/srep34395), 2016-10-06
Supplement: srep34395-s1.pdf [file srep34395-s1.pdf]

Characterization of maize *roothairless6* which encodes a D-type cellulose synthase and controls the switch from bulge formation to tip growth

Li Li, Stefan Hey, Sanzhen Liu, Qiang Liu Colton McNinch, Heng-Cheng Hu, Tsui-Jung Wen, Caroline Marcon, Anja Paschold, Wesley Bruce, Patrick S. Schnable, Frank Hochholdinger

**Supplementary Tables 1 and 2**

**Table S1.** Number of *rth6*-specific Seq-Walking reads recovered per *Mu* insertion site in the mapped interval on chromosome 1 based on maize reference genome AGPv2.

| <b><i>Mu</i> sites (bp)</b> | <b>No. of reads</b> |
|-----------------------------|---------------------|
| 102,196,700                 | 3                   |
| 102,580,900                 | 5                   |
| 102,626,800                 | 1                   |
| 103,419,600                 | 21                  |
| 104,610,900                 | 22,945              |
| 105,325,800                 | 10                  |
| 105,765,800                 | 3                   |
| 106,045,500                 | 14                  |
| 111,201,400                 | 1                   |
| 111,201,500                 | 11                  |
| 112,896,100                 | 2                   |
| 113,445,900                 | 1                   |
| 115,219,500                 | 31                  |
| 116,723,900                 | 1                   |
| 119,214,500                 | 1                   |
| 124,691,700                 | 44                  |
| 126,516,200                 | 3                   |
| 126,775,900                 | 1                   |
| 129,262,600                 | 2                   |
| 131,559,500                 | 10                  |
| 133,526,300                 | 1                   |
| 138,592,600                 | 4                   |
| 138,614,400                 | 30                  |
| 138,952,700                 | 37                  |
| 140,962,500                 | 43                  |

**Table S2:** Oligonucleotide primers used in this study.

| <b>Flanking IDP Markers:</b>       |                                               |
|------------------------------------|-----------------------------------------------|
| IDP6931-Fw                         | 5' TTGCATGTAGTGGGAAGTGC 3'                    |
| IDP6931-Rv                         | 5' TTAAATGGGCGAACATAGCC 3'                    |
| IDP525-Fw                          | 5' TATGGGAGTGAAAGCCATCC 3'                    |
| IDP525-Rv                          | 5' GCGTGCTGAGACTTACCTGG 3'                    |
| <b><i>Mutator</i> alleles:</b>     |                                               |
| MuTIR                              | 5' AGAGAAGCCAACGCCA(AT)CGCCTC(CT)ATTTTCGTC 3' |
| <i>rth6-2</i> ( <i>rth6C1R4</i> )  | 5' GCATGTTGACGTCAAGAAA 3'                     |
| <i>rth6-4</i> ( <i>rth6C1R2</i> )  | 5' ACTCCAGGGAGATCCGACTT 3'                    |
| <b><i>Ac/Ds</i> alleles:</b>       |                                               |
| <i>Ac/Ds</i> specific (JSR05)      | 5' CGTCCCGCAAGTTAAATATGA 3'                   |
| <i>rth6-5</i> ( <i>rth6C1R1</i> )  | 5' CTCCCCTCGGTGTTCTTGT 3'                     |
| <i>rth6-6</i> (I.S07.1244A-R)      | 5' CCCACTCGGTGTTCTTGTAAAG 3'                  |
| <b>qRT-PCR</b>                     |                                               |
| <i>ZmCsID1</i> -Fw                 | 5' CGGTGGAGCTTCTTGATG 3'                      |
| <i>ZmCsID1</i> -Rev                | 5' AGGAGGGCTGATGTAGAC 3'                      |
| <i>ZmCsID2</i> -Fw                 | 5' CAGCCGCACCATCTACAG 3'                      |
| <i>ZmCsID2</i> -Rev                | 5' GTTGATGGCCACCCACAG 3'                      |
| <i>ZmCsID3</i> -Fw                 | 5' CCGTTGGCAGTGATCGGTA 3'                     |
| <i>ZmCsID3</i> -Rev                | 5' CCAGCACCCAGAAGCTGAA 3'                     |
| <i>ZmCsID4</i> -Fw                 | 5' TCGTTTGGTCGGGACTCATC 3'                    |
| <i>ZmCsID4</i> -Rev                | 5' AAGCTAGGCGGTCGTTGTC 3'                     |
| <i>ZmCsID5</i> ( <i>rth6</i> )-Fw  | 5' CTGGGTGCTTGCTCATCTGT 3'                    |
| <i>ZmCsID5</i> ( <i>rth6</i> )-Rev | 5' GTTGGCAGCTTGATGGAG 3'                      |
| <i>Myosin</i> -Fw                  | 5' AGAAGGCCGTACAGGATCTTACC 3'                 |
| <i>Myosin</i> -Rev                 | 5' CAAGGAGAGACTCTGTGAGCTTCA 3'                |
